# Supplementary material for: Mitogenomics of southern hemisphere blue mussels (Bivalvia: Pteriomorphia): Insights into the evolutionary characteristics of the Mytilus edulis complex
Source: PubMed Central journal article supplement (PMC4886515; doi:10.1038/srep26853), 2016-05-31
Supplement: srep26853-s1.pdf [file srep26853-s1.pdf]

**Mitogenomics of southern hemisphere blue mussels (*Bivalvia: Pteriomorphia*): Insights into the evolutionary characteristics of the *Mytilus edulis* complex**

Juan Diego Gaitán-Espitia<sup>1,2\*</sup>, Julian F. Quintero-Galvis<sup>1,3</sup>, Andres Mesas<sup>1,3</sup> & Guillermo D'Elía<sup>1</sup>

<sup>1</sup> Instituto de Ciencias Ambientales y Evolutivas, Universidad Austral de Chile, Casilla 567 Valdivia, Chile.

<sup>2</sup> CSIRO Oceans and Atmosphere, GPO Box 1538, Hobart 7001, TAS, Australia

<sup>3</sup> Programa de Doctorado en Ciencias mención Ecología y Evolución, Facultad de Ciencias, Universidad Austral de Chile, Valdivia, Chile.

\* **Corresponding author:** Juan Diego Gaitán-Espitia. Instituto de Ciencias Ambientales y Evolutivas, Facultad de Ciencias, Universidad Austral de Chile, Casilla 567 Valdivia, Chile.

Tel: +56 63 221704; fax: +56 63 221673. Email address: [juadiegaitan@gmail.com](mailto:juadiegaitan@gmail.com)

## **Supplementary Figure Legends**

**Supplementary Figure S 1.** Alignment of the Atp8 gene among species of the Family Mytilidae.

**Supplementary Figure S 2.** Mitochondrial genome syntenies of pteriomorph bivalves.

M. chilensis  
Frame 1  
Complement

M. platensis  
Frame 1  
Complement

M. edulis  
Frame 1  
Complement

M. galloprovincialis  
Frame 1  
Complement

M. californianus  
Frame 1  
Complement

M. coruscus  
Frame 1  
Complement

M. trossulus  
Frame 1  
Complement

P. viridis  
Frame 1  
Complement

M. senhousia  
Frame 1  
Complement

B. exustus  
Frame 1  
Complement

M. chilensis  
Frame 1  
Complement

M. platensis  
Frame 1  
Complement

M. edulis  
Frame 1  
Complement

M. galloprovincialis  
Frame 1  
Complement

M. californianus  
Frame 1  
Complement

M. coruscus  
Frame 1  
Complement

M. trossulus  
Frame 1  
Complement

P. viridis  
Frame 1  
Complement

M. senhousia  
Frame 1  
Complement

B. exustus  
Frame 1  
Complement

1 10 20 30 40 50 60 70 80 90 100 110 120 130 140 150

1 10 20 30 40 50 60 70 80 90 100 110 120 130 140 150

160 170 180 190 200 210 220 230 240 250 258

160 170 180 190 200 210 220 230 240 250 258

*Mytilus edulis*  
complex

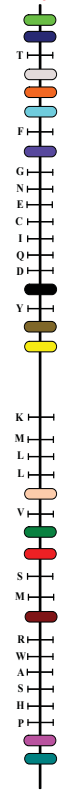

*Mytilus trossulus*

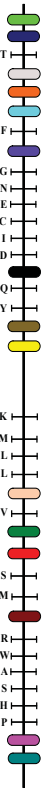

*Perna viridis*

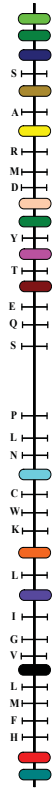

*Musculista senhousia*

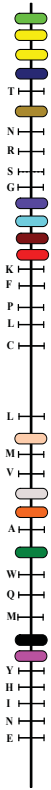

*Brachidontes exustus*

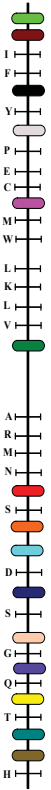

*Anadara sativa*

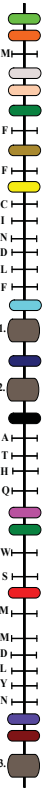

*Scapharca broughtonii*

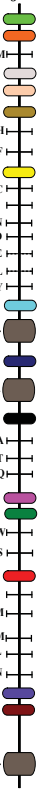

*Argopecten irradians*

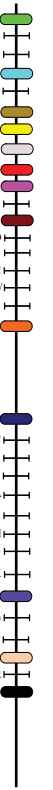

*Chlamys farreri*

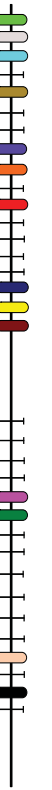

*Placopecten magellanicus*

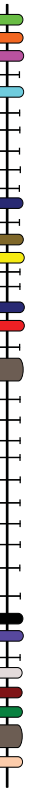

*Crassostrea gigas*

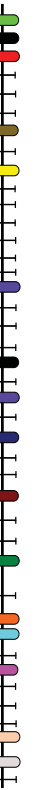

*Ostrea denselamellosa*

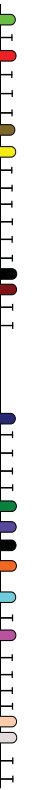

*Saccostrea mordax*

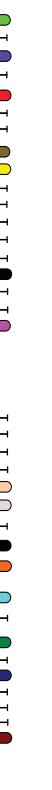

*Pinctada margaritifera*

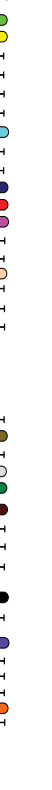

*Atrina pectinata*

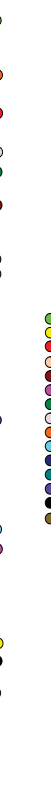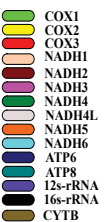

Supplementary Table 1. Mitogenome size and general features in Bivalvia. Columns represent protein coding genes with their lengths (bp). Start and stop codons for the protein coding genes are enclosed in parentheses.

| Subclass                        | Species                          | Total Size    | ATP6             | ATP8             | COX1              | COX2           | COX3           | CYTB              | ND1              | ND2              | ND3              | ND4               | ND4L             | ND5               | ND6              | %A   | %C   | %G   | %T   | %A-T | %G-C |
|---------------------------------|----------------------------------|---------------|------------------|------------------|-------------------|----------------|----------------|-------------------|------------------|------------------|------------------|-------------------|------------------|-------------------|------------------|------|------|------|------|------|------|
| Pteriormorpha                   | <i>Mytilus platensis</i>         | 16765         | 717<br>(ATG/AAA) | 255<br>(ATG/AAG) | 1665<br>(ATA/CAA) | 729 (ATG/T)    | 937 (ATG/T)    | 1308<br>(ATG/ATA) | 916<br>(GTG/GTG) | 948<br>(ATG/ATT) | 351<br>(ATG/GGT) | 1308<br>(ATG/CCT) | 282<br>(ATG/TCC) | 1707<br>(ATA/ATA) | 466<br>(ATG/AAA) | 30.2 | 11.4 | 28.8 | 29.8 | 60   | 40   |
|                                 | <i>Mytilus chilensis</i>         | 16765         | 717 (ATG/T)      | 255 (ATG/AAG)    | 1665 (ATA/CAA)    | 729 (ATG/T)    | 937 (ATG/T)    | 1308 (ATG/ATA)    | 916 (GTG/GTG)    | 948 (ATG/ATT)    | 351 (ATG/GGT)    | 1308 (ATG/CCT)    | 282 (ATG/TCC)    | 1707 (ATA/ATA)    | 466 (ATG/AAA)    | 30.2 | 11.4 | 28.6 | 29.8 | 60   | 40   |
|                                 | <i>Mytilus galloprovincialis</i> | 16744         | 717 (ATG/T)      | 255 (ATG/AAG)    | 1665 (ATA/CAA)    | 729 (ATG/T)    | 936 (ATG/T)    | 1308 (ATG/ATA)    | 916 (GTG/GTG)    | 948 (ATG/ATT)    | 351 (ATG/GGT)    | 1308 (ATG/CCT)    | 282 (ATG/TCC)    | 1705 (ATA/TTT)    | 465 (ATG/AAA)    | 29.4 | 12.2 | 29.4 | 29.0 | 58.4 | 41.6 |
|                                 | <i>Mytilus trossulus</i>         | 18652         | 717 (ATG/T)      | 255 (ATG/AAG)    | 1656 (ATA/CAA)    | 729 (ATG/T)    | 933 (ATG/T)    | 1308 (ATG/ATA)    | 918 (GTG/GTG)    | 948 (ATG/ATT)    | 351 (ATG/GGT)    | 1308 (ATG/CCT)    | 282 (ATG/TCC)    | 1707 (ATA/ATA)    | 465 (ATG/AAA)    | 31.8 | 12.2 | 25.9 | 30.2 | 62   | 38   |
|                                 | <i>Mytilus californianus</i>     | 16730         | 717 (ATG/T)      | 255 (ATG/AAG)    | 1656 (ATA/CAA)    | 729 (ATG/T)    | 936 (ATG/T)    | 1308 (ATG/ATA)    | 916 (GTG/GTG)    | 948 (ATG/ATT)    | 351 (ATG/GGT)    | 1308 (ATG/CCT)    | 282 (ATG/TCC)    | 1710 (ATA/ATA)    | 465 (ATG/AAA)    | 31.0 | 10.6 | 28.6 | 29.8 | 60.8 | 39.2 |
|                                 | <i>Mytilus coruscus</i>          | 16642         | 717 (ATG/T)      | 255 (ATG/AAG)    | 1656 (ATA/CAA)    | 729 (ATG/T)    | 936 (ATG/T)    | 1308 (ATG/ATA)    | 918 (GTG/GTG)    | 948 (ATG/ATT)    | 351 (ATG/GGT)    | 1308 (ATG/CCT)    | 282 (ATG/TCC)    | 1710 (ATA/ATA)    | 465 (ATG/AAA)    | 31.0 | 11.4 | 27.5 | 30.2 | 61.2 | 38.8 |
|                                 | <i>Mytilus edulis</i>            | 16740         | 717 (ATG/T)      | 255 (ATG/AAG)    | 1656 (ATA/CAA)    | 729 (ATG/T)    | 933 (ATG/T)    | 1308 (ATG/ATA)    | 918 (GTG/GTG)    | 948 (ATG/ATT)    | 351 (ATG/GGT)    | 1308 (ATG/CCT)    | 282 (ATG/TCC)    | 1707 (ATA/ATA)    | 467 (ATG/AAA)    | 29.8 | 11.4 | 29.4 | 29.4 | 59.2 | 40.8 |
|                                 | <i>Musculista senhousia</i>      | 20612         | 714 (ATG/T)      | 189 (ATG/GTT)    | 1584 (ATG/GTA)    | 813 (ATG/GTA)  | 855 (ATG/GTA)  | 1197 (ATA/T)      | 966 (ATG/GTA)    | 945 (ATA/AGT)    | 375 (ATG/TCT)    | 1329 (ATA/TGT)    | 216 (ATA/TTT)    | 1765 (ATA/TTT)    | 438 (ATA/AGC)    | 45.7 | 8.7  | 19.6 | 26.1 | 71.7 | 28.3 |
|                                 | <i>Perna viridis</i>             | 16014         | 714 (ATG/AAA)    | 150 (ATT/TGA)    | 1536 (ATG/T)      | 690 (GTG/T)    | 825 (ATG/GTA)  | 1152 (ATG/TCA)    | 1188 (ATG/TTC)   | 945 (ATG/AAT)    | 956 (ATA/AGT)    | 354 (ATA/TGT)     | 1317 (ATA/TTT)   | 1683 (ATA/TTT)    | 540 (ATA/AGC)    | 29.2 | 9.3  | 21.0 | 40.5 | 69.7 | 30.3 |
|                                 | <i>Brachidontes exustus</i>      | 16600         | 747 (ATG/T)      | 114 (TTG/TTT)    | 1605 (ATG/T)      | 666 (ATG/GTA)  | 855 (ATG/TCA)  | 1278 (ATG/TTC)    | 933 (ATG/AAT)    | 963 (ATG/GTA)    | 351 (ATG/TGT)    | 1299 (GTG/TCT)    | 1731 (ATG/TTA)   | 465 (ATG/GTT)     | 468 (ATG/AAA)    | 17.6 | 14.8 | 28.6 | 30.0 | 56.6 | 43.4 |
| <i>Anodara sativa</i>           | 48161                            | 525 (ATA/T)   | 184 (ATG/AGA)    | 1584 (ATG/TTA)   | 813 (ATG/TTA)     | 855 (ATG/TCA)  | 1197 (ATA/T)   | 966 (ATG/GTA)     | 945 (ATA/AGT)    | 375 (ATG/TCT)    | 1329 (ATA/TGT)   | 216 (ATA/TTT)     | 1765 (ATA/TTT)   | 438 (ATA/AGC)     | 27.5             | 17.4 | 20.3 | 34.8 | 62.3 | 37.7 |      |
| <i>Scapharca broughtonii</i>    | 46985                            | 525 (ATA/AGG) | 184 (ATG/AGA)    | 1584 (ATG/TTA)   | 813 (ATG/TTA)     | 855 (ATG/TCA)  | 1197 (ATA/T)   | 966 (ATG/GTA)     | 945 (ATA/AGT)    | 375 (ATG/TCT)    | 1329 (ATA/TGT)   | 216 (ATA/TTT)     | 1765 (ATA/TTT)   | 438 (ATA/AGC)     | 25.3             | 8.8  | 22.5 | 43.4 | 68.8 | 31.2 |      |
| <i>Argopecten irradians</i>     | 16211                            | 750 (GTG/T)   | 160 (ATA/AGG)    | 699 (GTG/TCT)    | 825 (GTG/TCT)     | 1158 (TTG/TCT) | 1158 (GTG/GTT) | 945 (TTG/CCT)     | 956 (ATA/GAT)    | 348 (ATG/CCT)    | 1317 (ATA/GGT)   | 275 (ATG/TCT)     | 1683 (ATG/GAT)   | 540 (ATG/GAT)     | 18.9             | 14.1 | 29.6 | 37.4 | 56.3 | 43.7 |      |
| <i>Argopecten purpuratus</i>    | 16266                            | 636 (ATA/T)   | 160 (ATG/AGG)    | 671 (ATG/TCT)    | 828 (ATA/TTT)     | 1158 (TTG/TCT) | 1158 (GTG/GTT) | 945 (ATA/TTT)     | 957 (ATA/GAT)    | 348 (ATG/CCT)    | 1317 (ATA/GGT)   | 275 (ATG/TCT)     | 1683 (ATG/GAT)   | 540 (ATG/GAT)     | 17.6             | 14.8 | 28.6 | 30.0 | 56.6 | 43.4 |      |
| <i>Chlamys farreri</i>          | 21695                            | 789 (ATG/AGG) | 164 (ATG/AGG)    | 671 (ATG/GTT)    | 852 (ATG/AGG)     | 1155 (ATG/AGG) | 1155 (ATG/AGG) | 948 (ATG/CCT)     | 957 (ATA/TTT)    | 353 (ATA/TGC)    | 1284 (ATG/TTA)   | 318 (ATA/T)       | 1779 (ATG/GTT)   | 495 (ATA/AGA)     | 20.4             | 12.5 | 27.5 | 39.6 | 60   | 40   |      |
| <i>Minchamys senatori</i>       | 17383                            | 882 (ATG/AGG) | 153 (ATG/AGG)    | 671 (ATA/GTT)    | 864 (ATG/GAG)     | 1264 (ATG/TTA) | 1264 (TTG/TTA) | 966 (ATG/GAT)     | 966 (ATG/GAT)    | 333 (ATG/ATG)    | 1245 (ATG/GTA)   | 324 (ATG/TGT)     | 1746 (ATG/AGG)   | 495 (ATG/AGG)     | 18.2             | 14.7 | 27.7 | 39.4 | 57.6 | 42.4 |      |
| <i>Placopecten magellanicus</i> | 32115                            | 730 (ATA/AAG) | 1513 (ATG/GTG)   | 685 (ATG/TGG)    | 828 (ATA/GGT)     | 1188 (TTG/TAC) | 1188 (ATG/TGG) | 942 (GTG/CCT)     | 966 (ATG/GAT)    | 372 (ATG/ATG)    | 1284 (GTG/GGG)   | 297 (ATG/CCA)     | 1860 (ATA/AGT)   | 567 (ATG/CCA)     | 14.8             | 13.4 | 34.9 | 48.3 | 51.7 | 48.3 |      |
| <i>Crassostrea angulata</i>     | 18408                            | 684 (ATA/T)   | 1617 (ATG/TGT)   | 702 (ATG/GGA)    | 876 (ATG/TCT)     | 1239 (CTA/T)   | 936 (ATG/ATT)  | 999 (ATG/TAC)     | 999 (ATG/GAT)    | 351 (ATG/ATG)    | 1350 (ATG/GCT)   | 283 (ATG/GCT)     | 1671 (ATG/GTT)   | 474 (ATT/TTT)     | 27.6             | 14.7 | 22.1 | 35.6 | 63.2 | 36.8 |      |
| <i>Crassostrea ariakensis</i>   | 18414                            | 675 (ATG/T)   | 1617 (ATA/TGT)   | 702 (ATG/GGA)    | 864 (ATG/TCT)     | 1233 (TTA/TTT) | 936 (ATG/TTC)  | 999 (ATG/TAC)     | 999 (ATG/AGG)    | 351 (ATG/GCA)    | 1350 (ATG/GCA)   | 283 (ATG/GTT)     | 1671 (ATG/TAC)   | 480 (ATG/TAC)     | 26.8             | 15.2 | 22.5 | 35.5 | 62.3 | 37.7 |      |
| <i>Crassostrea gigas</i>        | 18225                            | 684 (ATG/T)   | 1617 (ATG/TGT)   | 702 (ATG/GGA)    | 876 (ATG/TCT)     | 1239 (CTA/AAT) | 936 (ATG/ATT)  | 999 (ATG/TAC)     | 999 (ATG/GAT)    | 351 (ATG/ATG)    | 1353 (ATG/ATG)   | 283 (ATG/GCT)     | 1671 (ATG/GTT)   | 477 (ATG/TTC)     | 24.6             | 15.1 | 22.0 | 38.2 | 62.9 | 37.1 |      |
| <i>Ostrea denselamellosa</i>    | 16277                            | 675 (GTG/GCC) | 669 (ATG/ATC)    | 1596 (ATG/GGA)   | 880 (ATG/TCC)     | 1161 (ATA/GAG) | 1161 (ATG/ATG) | 933 (ATG/TAC)     | 999 (ATG/AGC)    | 354 (ATG/TTT)    | 1350 (GTG/GAA)   | 283 (ATA/ATG)     | 1671 (ATG/AAA)   | 468 (ATG/AAA)     | 22.9             | 16.2 | 23.8 | 37.1 | 60   | 40   |      |
| <i>Ostrea edulis</i>            | 16320                            | 669 (ATA/GTA) | 693 (ATG/ATC)    | 1566 (ATG/ATC)   | 888 (ATA/TCT)     | 1161 (ATC/GAG) | 1161 (ATG/ATA) | 916 (ATG/TAC)     | 1008 (ATG/AGC)   | 354 (ATG/TTT)    | 1350 (ATG/GAG)   | 282 (ATG/ATT)     | 1548 (ATA/TCA)   | 468 (ATG/TTT)     | 26.5             | 13.0 | 20.9 | 39.5 | 66   | 34   |      |
| <i>Ostrea lurida</i>            | 16344                            | 570 (ATG/T)   | 102 (ATA/TTA)    | 1611 (ATA/T)     | 693 (ATG/AAT)     | 880 (ATG/TCT)  | 1053 (ATA/GAG) | 858 (ATG/ATA)     | 1005 (ATG/AGC)   | 353 (ATG/ATT)    | 1350 (ATA/GAG)   | 264 (ATG/GTT)     | 1671 (ATG/TCA)   | 474 (ATG/TCA)     | 26.5             | 13.0 | 20.9 | 39.5 | 66   | 34   |      |
| <i>Saxostrea mordax</i>         | 16532                            | 678 (ATG/AAA) | 682 (ATG/AAA)    | 1656 (ATG/T)     | 896 (ATG/T)       | 1173 (ATG/TCT) | 1173 (ATG/TCT) | 948 (ATG/TTT)     | 975 (ATA/TAT)    | 354 (ATG/AAT)    | 1350 (ATG/CCT)   | 282 (ATG/GAA)     | 1671 (GTG/CCC)   | 468 (GTG/CCC)     | 20.9             | 13.9 | 25.2 | 40.0 | 60.9 | 39.1 |      |
| <i>Arima pectinata</i>          | 16811                            | 702 (GTG/CAG) | 643 (ATG/CAG)    | 1560 (ATG/GCC)   | 887 (GTG/GTG)     | 1146 (ATC/CGT) | 1146 (ATG/ATT) | 931 (ATG/ATT)     | 999 (ATG/TCT)    | 345 (ATG/TTT)    | 1359 (ATG/GTT)   | 303 (ATG/GTT)     | 1755 (ATG/ATT)   | 471 (ATG/ATT)     | 20.6             | 8.7  | 28.2 | 42.5 | 63.1 | 36.9 |      |
| <i>Pinctada margaritifera</i>   | 15680                            | 849 (ATG/AAA) | 849 (ATG/AAA)    | 1557 (ATG/GAG)   | 781 (ATG/GAG)     | 1146 (ATG/GAG) | 1146 (ATG/GAG) | 936 (ATG/ATC)     | 970 (ATG/ATG)    | 345 (ATG/T)      | 1359 (ATG/GGG)   | 303 (ATG/ACC)     | 1755 (ATG/ACC)   | 471 (ATG/ACC)     | 21.1             | 10.2 | 29.2 | 39.6 | 60.7 | 39.3 |      |
| <i>Meretrix meretrix</i>        | 19826                            | 849 (ATG/AAA) | 849 (ATG/AAA)    | 1557 (ATG/GAG)   | 781 (ATG/GAG)     | 1146 (ATG/GAG) | 1146 (ATG/GAG) | 936 (ATG/ATC)     | 970 (ATG/ATG)    | 345 (ATG/T)      | 1359 (ATG/GGG)   | 303 (ATG/ACC)     | 1755 (ATG/ACC)   | 471 (ATG/ACC)     | 22.1             | 10.3 | 22.7 | 44.9 | 67   | 33   |      |
| <i>Loripes lacteus</i>          | 17321                            | 645 (ATG/AGG) | 118 (ATG/AGG)    | 1557 (ATA/AAA)   | 879 (ATA/AGG)     | 1140 (ATG/ATG) | 1140 (ATG/ATG) | 936 (ATG/AAA)     | 967 (ATG/GCT)    | 348 (ATG/TTA)    | 1350 (GTG/CAC)   | 327 (ATA/GTG)     | 1773 (ATA/TTG)   | 486 (ATA/TTG)     | 21.0             | 13.2 | 26.3 | 39.5 | 60.5 | 39.5 |      |
| <i>Lucinella divaricata</i>     | 18940                            | 690 (ATA/GTA) | 114 (ATP/TTT)    | 1554 (ATA/AGG)   | 930 (ATA/TCT)     | 1142 (ATG/GTT) | 1142 (ATG/GTT) | 939 (ATG/AAA)     | 1038 (ATA/ATC)   | 342 (ATG/GAA)    | 1350 (ATG/TTA)   | 282 (ATG/TTT)     | 1671 (ATG/TTT)   | 483 (GTG/TTT)     | 21.3             | 13.0 | 25.4 | 40.3 | 61.6 | 38.4 |      |
| <i>Mya arenaria</i>             | 17947                            | 729 (ATG/T)   | 175 (ATA/TTA)    | 1434 (ATG/AAA)   | 861 (ATG/TTT)     | 1041 (ATA/TTA) | 1041 (ATA/TTA) | 912 (ATG/TTT)     | 1065 (ATG/ACT)   | 423 (ATG/AAA)    | 1365 (ATA/TTT)   | 384 (ATA/TTA)     | 1518 (ATA/AAAC)  | 546 (ATA/AAAC)    | 25.8             | 12.0 | 23.6 | 38.7 | 64.5 | 35.5 |      |
| <i>Palaeoheterodont</i>         | <i>Anodonta anatina</i>          | 15637         | 702 (ATA/T)      | 165 (ATG/AAG)    | 1542 (TTG/AGG)    | 681 (ATG/T)    | 780 (ATG/TCT)  | 1155 (ATT/TTT)    | 855 (TTG/TTA)    | 966 (ATG/TTC)    | 357 (ATG/GTG)    | 1347 (ATT/CTA)    | 297 (GTG/TTT)    | 1737 (GTG/CTT)    | 489 (ATT/TTT)    | 36.7 | 18.4 | 18.4 | 35.7 | 72.4 | 27.6 |
| <i>Protobranchia</i>            | <i>Solemya velum</i>             | 15660         | 696 (ATG/CAT)    | 165 (ATG/AAA)    | 1536 (ATG/GCC)    | 887 (ATG/GCC)  | 1123 (ATG/AGG) | 1123 (ATG/AGG)    | 924 (ATT/TGT)    | 1089 (ATG/ATT)   | 353 (ATG/TTA)    | 1344 (ATG/AAA)    | 297 (ATA/ATT)    | 727 (ATG/TGT)     | 501 (ATG/AGG)    | 47.5 | 20.8 | 8.6  | 23.2 | 70.7 | 29.3 |

Supplementary Table 2. Codons that may be under positive selection

| Codon | Gene        | SLAC  |         | FEL   |         | MEME    | FUBAR |           |
|-------|-------------|-------|---------|-------|---------|---------|-------|-----------|
|       |             | dN-dS | p-value | dN-dS | p-value | p-value | dN-dS | Post. Pr. |
| 246   | <i>Cytb</i> | 0.43  | 0.30    | 0.26  | 0.12    | 0.03    | -0.08 | 0.47      |
| 275   | <i>Cytb</i> | 0.36  | 0.54    | 0.18  | 0.29    | 0.00    | -0.51 | 0.14      |
| 383   | <i>Cytb</i> | 0.50  | 0.43    | 0.84  | 0.27    | 0.02    | -0.21 | 0.47      |
| 384   | <i>Cytb</i> | -0.12 | 0.72    | 5.70  | 0.04    | 0.00    | 2.20  | 0.56      |
| 1016  | <i>Nad4</i> | 0.53  | 0.28    | 0.36  | 0.09    | 0.02    | -0.24 | 0.39      |
| 1059  | <i>Nad4</i> | 0.28  | 0.47    | 0.83  | 0.45    | 0.02    | -0.33 | 0.32      |
| 1267  | <i>Nad4</i> | 0.36  | 0.54    | 0.17  | 0.35    | 0.01    | -0.55 | 0.11      |
| 1362  | <i>Nad4</i> | 0.58  | 0.20    | 0.28  | 0.09    | 0.02    | -0.05 | 0.52      |
| 1941  | <i>Nad2</i> | 0.76  | 0.20    | 1.18  | 0.04    | 0.10    | 0.21  | 0.72      |
| 2092  | <i>Atp8</i> | 0.28  | 0.51    | 0.23  | 0.48    | 0.03    | -0.59 | 0.09      |
| 3029  | <i>Nad5</i> | 0.71  | 0.17    | 0.36  | 0.04    | 0.05    | 0.06  | 0.69      |
| 3753  | <i>Nad6</i> | 0.54  | 0.33    | 0.67  | 0.57    | 0.00    | -0.41 | 0.34      |
| 3764  | <i>Nad6</i> | 0.42  | 0.43    | 0.23  | 0.31    | 0.00    | -0.59 | 0.13      |
| 3766  | <i>Nad6</i> | 0.17  | 0.53    | 0.07  | 0.87    | 0.00    | -0.35 | 0.18      |

Supplementary Table 3. dN/dS comparisons

| Gene         | Number of codons | dN   | dS   | Normalized dN/dS |
|--------------|------------------|------|------|------------------|
| <i>Cytb</i>  | 446              | 0.33 | 1.15 | 0.144            |
| <i>Cox2</i>  | 290              | 0.41 | 1.16 | 0.179            |
| <i>Nad1</i>  | 333              | 0.40 | 1.20 | 0.168            |
| <i>Nad4</i>  | 450              | 0.67 | 1.61 | 0.222            |
| <i>Cox3</i>  | 312              | 0.49 | 1.56 | 0.159            |
| <i>Nad2</i>  | 342              | 0.67 | 1.57 | 0.227            |
| <i>Nad3</i>  | 125              | 0.40 | 1.20 | 0.176            |
| <i>Atp8</i>  | 95               | 0.76 | 1.38 | 0.212            |
| <i>Cox1</i>  | 556              | 0.48 | 2.15 | 0.096            |
| <i>Atp6</i>  | 254              | 0.55 | 1.28 | 0.193            |
| <i>Nad4L</i> | 94               | 0.84 | 1.72 | 0.232            |
| <i>Nad5</i>  | 603              | 0.56 | 1.29 | 0.214            |
| <i>Nad6</i>  | 182              | 0.81 | 1.74 | 0.262            |

**Supplementary Table 4.** Best Partition Scheme (BPS) and best-fit models of molecular evolution for the subsets partitions of the mitochondrial protein-coding genes alignment.

| Subset | Model   | Partition for codon position                           |
|--------|---------|--------------------------------------------------------|
| 1      | GTR+I+G | <i>Cox1_1, Cox2_1, Cox3_1, Cytb_1, Nad1_1, Nad3_1</i>  |
| 2      | GTR+G   | <i>Cox1_2</i>                                          |
| 3      | HKY+I+G | <i>Cox2_2, Cox3_2, Cytb_2, Nad1_2, Nad3_2</i>          |
| 4      | GTR+I   | <i>Cox1_3, Cox2_3, Cox3_3, Cytb_3, Nad1_3, Nad3_3</i>  |
| 5      | GTR+I+G | <i>Nad2_1, Nad4_1, Nad4L_1, Nad5_1, Nad6_1, Atp6_1</i> |
| 6      | HKY+I+G | <i>Nad2_2, Nad4_2, Nad4L_2, Nad5_2, Nad6_2, Atp6_2</i> |
| 7      | GTR+I   | <i>Nad2_3, Nad4_3, Nad4L_3, Nad5_3, Nad6_3, Atp6_3</i> |
